# Supplementary material for: Nickel Enhances Zinc-Induced Neuronal Cell Death by Priming the Endoplasmic Reticulum Stress Response
Source: Hindawi journal article supplement (doi:10.1155/2019/9693726), 2019-06-17
Supplement: f1 [file 9693726.f1.pdf]

## **Nickel enhances zinc-induced neuronal cell death by priming the endoplasmic reticulum stress response**

Ken-ichiro Tanaka<sup>1,\*</sup>, Misato Kasai<sup>1</sup>, Mikako Shimoda<sup>1</sup>, Ayane Shimizu<sup>1</sup>, Maho Kubota<sup>1</sup>,  
Masahiro Kawahara<sup>1,\*</sup>.

Department of Bio-Analytical Chemistry, Faculty of Pharmacy, Musashino University,  
1-1-20 Shinmachi, Nishitokyo-shi, Tokyo 202-8585, Japan.

\*Co-corresponding authors: Ken-ichiro Tanaka, Email: [k-tana@musashino-u.ac.jp](mailto:k-tana@musashino-u.ac.jp) or  
Masahiro Kawahara, Email: [makawa@musashino-u.ac.jp](mailto:makawa@musashino-u.ac.jp)

Keywords: Zinc, nickel, cell death, ER stress, ROS, CHOP

**A**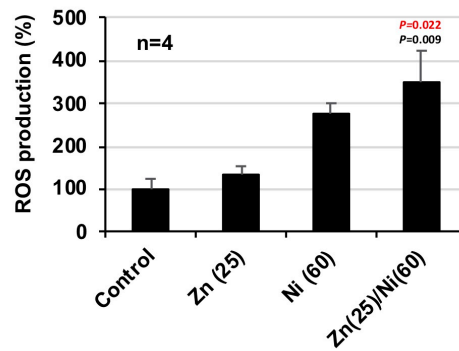**B**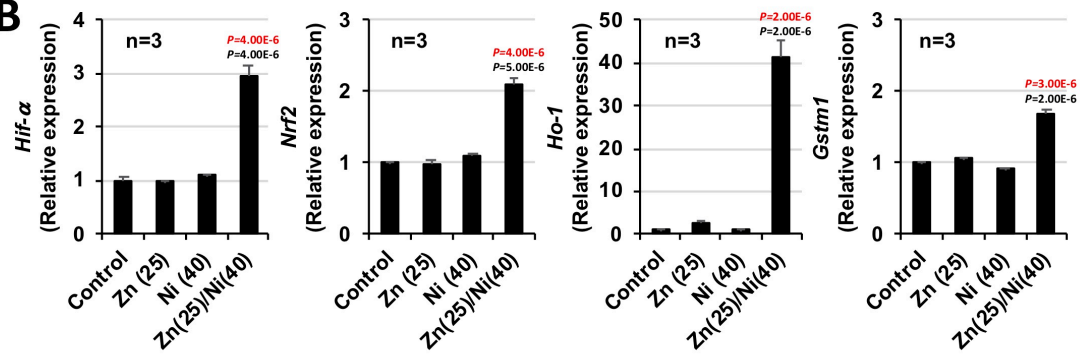**C**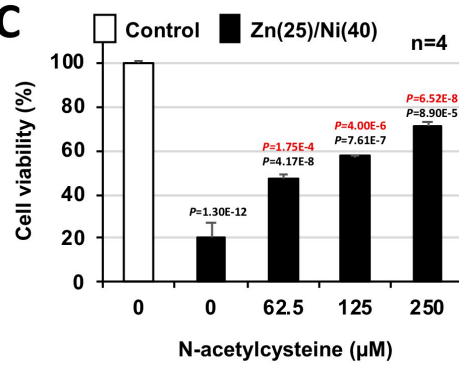**D**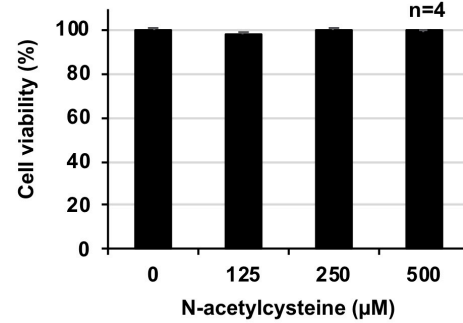**E**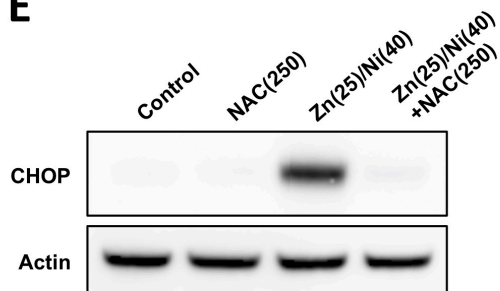**F**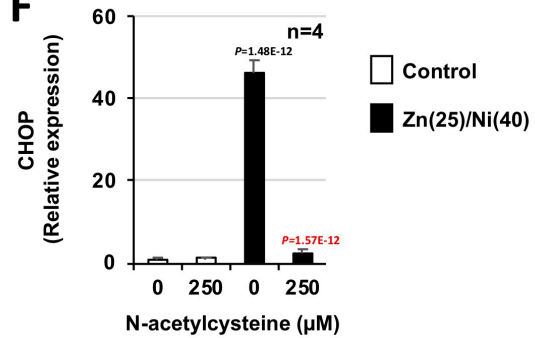

## Supplementary Figure S1

GT1-7 cells (6-well culture plates at a density of  $7.5 \times 10^5$  cells per well) were incubated with DCFHDA (100  $\mu$ M), an indicator of ROS, in the absence (Control) or presence of NiCl<sub>2</sub> (Ni, 60  $\mu$ M) and/or ZnCl<sub>2</sub> (Zn, 25  $\mu$ M) for 2 h. DCFHDA fluorescence (ex 485 nm, em 530 nm) was measured using a fluorescence microplate reader (A). GT1-7 cells (6-well culture plates at a density of  $7.5 \times 10^5$  cells per well) were incubated in the absence (Control) or presence of NiCl<sub>2</sub> (Ni, 40  $\mu$ M) and ZnCl<sub>2</sub> (Zn, 25  $\mu$ M) for 4 h. Total RNA was extracted and subjected to real-time RT-PCR using primer sets specific for each gene. Values were normalized to *Gapdh* and expressed relative to the control (B). GT1-7 cells (96-well culture plates at a density of  $3 \times 10^4$  cells per well (C, D), 6-well culture plates at a density of  $7.5 \times 10^5$  cells per well (E, F)) were pre-treated with the indicated concentrations ( $\mu$ M) of N-acetylcysteine just before Ni<sup>2+</sup>/Zn<sup>2+</sup> treatment. Next, GT1-7 cells were incubated in the absence (Control) or presence of NiCl<sub>2</sub> (40  $\mu$ M) and ZnCl<sub>2</sub> (25  $\mu$ M) for 24 h (C) or 7 h (E, F). GT1-7 cells were treated with the indicated concentrations of N-acetylcysteine for 24 h (D). Cell viability was determined using CellTiter-Glo® 2.0 (C, D). Whole-cell extracts were analyzed by immunoblotting with an antibody against CHOP or actin (E). The band intensity of CHOP was determined using ImageJ software (F). Values represent mean  $\pm$  S.E.M. *P* values are described in the figure when *P* < 0.05. [Black: vs. Control, Red: vs. ZnCl<sub>2</sub> alone] (A, B) or [Black: vs. Control, Red: vs. Zn(25)/Ni(40)] (C, F).
